# Supplementary material
Source: PubMed Central journal article supplement (PMC321763)

a

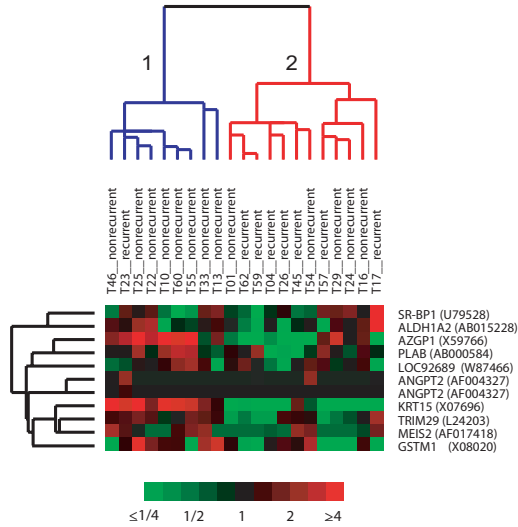

b

| Sample Name       | Group | Observed Outcome | Recurrence (months) |
|-------------------|-------|------------------|---------------------|
| T55__nonrecurrent | 1     | 0                | 66                  |
| T01__nonrecurrent | 2     | 0                | 55                  |
| T60__nonrecurrent | 1     | 0                | 55                  |
| T46__nonrecurrent | 1     | 0                | 57                  |
| T13__nonrecurrent | 1     | 0                | 54                  |
| T10__nonrecurrent | 1     | 0                | 50                  |
| T22__nonrecurrent | 1     | 0                | 54                  |
| T54__nonrecurrent | 2     | 0                | 51                  |
| T24__nonrecurrent | 2     | 0                | 54                  |
| T29__nonrecurrent | 2     | 0                | 51                  |
| T25__nonrecurrent | 1     | 0                | 52                  |
| T16__nonrecurrent | 2     | 0                | 49                  |
| T33__nonrecurrent | 1     | 0                | 15                  |
| T59__recurrent    | 2     | 1                | 26                  |
| T57__recurrent    | 2     | 1                | 4                   |
| T23__recurrent    | 1     | 1                | 37                  |
| T45__recurrent    | 2     | 1                | 6                   |
| T17__recurrent    | 2     | 1                | 3                   |
| T26__recurrent    | 2     | 1                | 14                  |
| T04__recurrent    | 2     | 1                | 46                  |
| T62__recurrent    | 2     | 1                | 30                  |

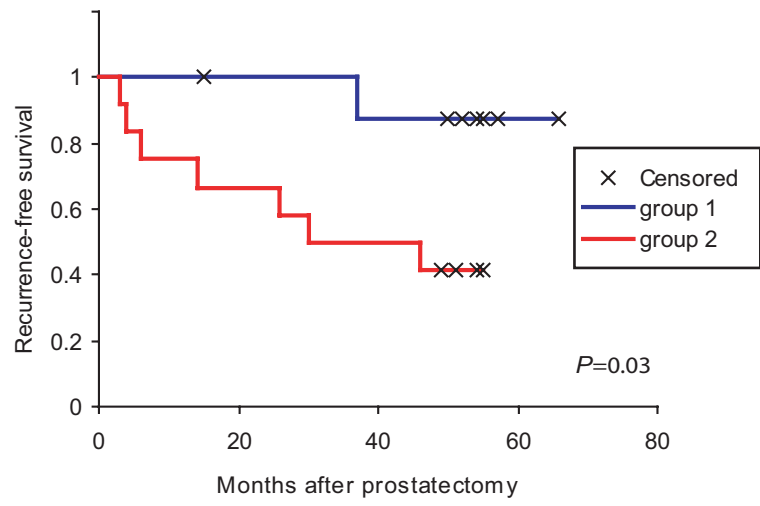

Supplement: pnas_0304146101_10.pdf [file pnas_0304146101_10.pdf]
