# Supplementary material
Source: PubMed Central journal article supplement (PMC321763)

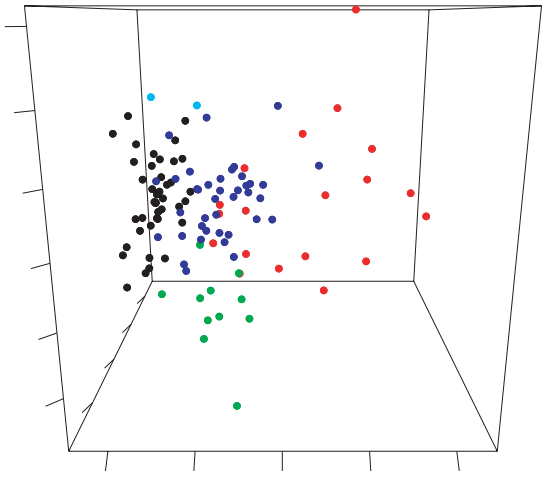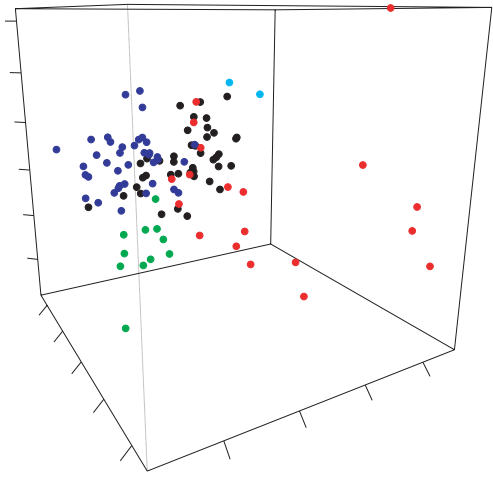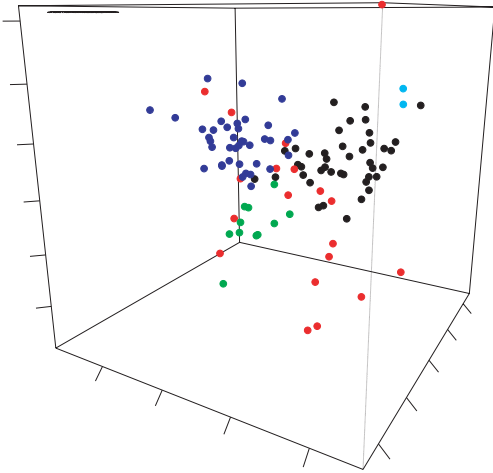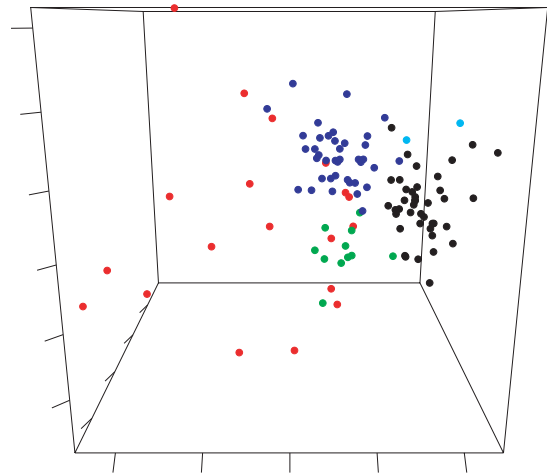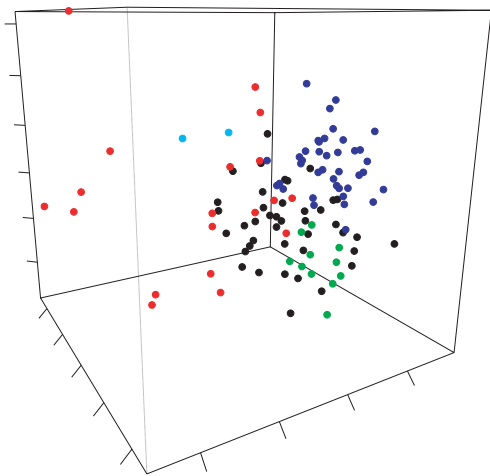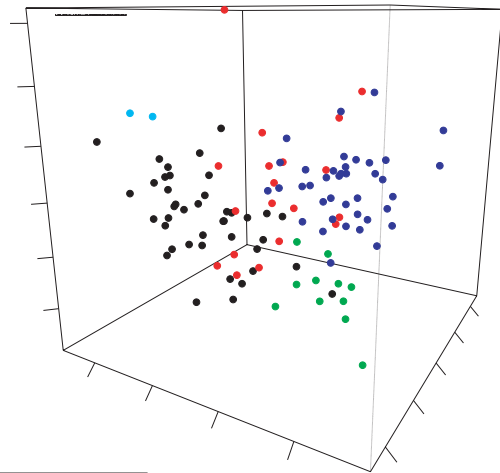

- normal
- tumor subtype I
- tumor subtype II
- tumor subtype III
- tumor clustering with normals

Supplement: pnas_0304146101_6.pdf [file pnas_0304146101_6.pdf]
